# Supplementary material for: Preparation of metallic BEDT-TTF charge transfer complex of 3,3′,5,5′-tetranitro-4,4′-biphenyldiol dianion (TNBP2−) having flexible molecular shape
Source: Royal Society of Chemistry journal article supplement (doi:10.1039/a907746d), 2000-01-01
Supplement: a907746dt1.doc [file a907746dt1.doc]

Table 1 Crystal data and structure refinement data for (TBA)2(TNBP)

|  | (TBA)2(TNBP) |
| --- | --- |
| formula | C44H76N6O10 |
| formula weight | 849.12 |
| shape and color | red plate |
| crystal dimension /mm3 | 0.80.60.1 |
| crystal system | Monoclinic |
| space group | C2/c |
| ***a***/Å | 42.770(3) |
| ***b*** /Å | 12.461(2) |
| ***c*** /Å | 19.025(1) |
| ****** /° | 107.861(5) |
| ***V*** /Å3 | 9651(2) |
| ***Z*** | 8 |
| density(calc.)/g cm-3) | 1.168 |
| diffractometer | Mac Science DIP-2020K |
| radiation type | Mo K |
| monochromator | graphite |
| X-ray voltage and current | 50 kV, 36 mA |
| temperature | room temperature |
| **Mo K/mm-1 | 0.083 |
| 2**max /° | 55 |
| no. of independent  observed reflections | 8938 |
| determination of initial phase | direct method (shelxs-97) |
| hydrogen atoms | Positions were calculated, assuming C-H  bond length as 0.96Å and sp3 or sp2 conformation of the carbon atoms.  Temperature factors are refined. |
| least square method | full matrix, refinement on *F*O2 (shelxl-97) |
| criterion for obsd reflections | *F*04***F*0) |
| no. of reflections used refinement | 5767 |
| no. of refined parameters | 617 |
| Temperature factor | Non-hydrogen atoms were anisotropic, and hydrogen atoms were isotropic. |
| ***R*** | 0.0674 |
|  |  |

Table 2

Atomic coordinates and thermal parameters of (TBA)2(TNBP)

| Atom | SOF | x | y | z | Ueq |
| --- | --- | --- | --- | --- | --- |
| C1 | 1.00 | 0.11452(7) | 0.6360(3) | 0.16590(16) | 0.0589(7) |
| H1A | 1.00 | 0.1303 | 0.6851 | 0.1962 | 0.066(9) |
| H1B | 1.00 | 0.1020 | 0.6744 | 0.1227 | 0.057(8) |
| C2 | 1.00 | 0.09154(10) | 0.6009(3) | 0.2080(2) | 0.0766(10) |
| H2A | 1.00 | 0.1040 | 0.5706 | 0.2546 | 0.107(17) |
| H2B | 1.00 | 0.0769 | 0.5467 | 0.1805 | 0.120(13) |
| C3 | 1.00 | 0.07165(9) | 0.6962(3) | 0.22124(19) | 0.0780(10) |
| H3A | 1.00 | 0.0864 | 0.7506 | 0.2481 | 0.093(14) |
| H3B | 1.00 | 0.0592 | 0.7260 | 0.1745 | 0.102(11) |
| C4 | 1.00 | 0.04873(12) | 0.6651(5) | 0.2635(3) | 0.1108(16) |
| H4A | 1.00 | 0.0369 | 0.7272 | 0.2709 | 0.126(17) |
| H4B | 1.00 | 0.0611 | 0.6359 | 0.3105 | 0.114(15) |
| H4C | 1.00 | 0.0335 | 0.6121 | 0.2362 | 0.132(19) |
| C5 | 1.00 | 0.15269(8) | 0.5976(3) | 0.09662(16) | 0.0602(8) |
| H5A | 1.00 | 0.1376 | 0.6328 | 0.0550 | 0.059(8) |
| H5B | 1.00 | 0.1665 | 0.6519 | 0.1263 | 0.060(8) |
| C6 | 1.00 | 0.17399(10) | 0.5227(3) | 0.0684(2) | 0.0839(11) |
| H6A | 1.00 | 0.1602 | 0.4747 | 0.0326 | 0.100(13) |
| H6B | 1.00 | 0.1874 | 0.4805 | 0.1086 | 0.107(14) |
| C7 | 1.00 | 0.19616(11) | 0.5852(4) | 0.0329(2) | 0.0949(13) |
| H7A | 1.00 | 0.2043 | 0.5366 | 0.0036 | 0.136(18) |
| H7B | 1.00 | 0.1831 | 0.6383 | 0.0003 | 0.089(12) |
| C8 | 1.00 | 0.22441(12) | 0.6394(6) | 0.0862(3) | 0.1253(18) |
| H8A | 1.00 | 0.2367 | 0.6781 | 0.0598 | 0.23(3) |
| H8B | 1.00 | 0.2383 | 0.5867 | 0.1174 | 0.68(14) |
| H8C | 1.00 | 0.2166 | 0.6884 | 0.1159 | 0.20(3) |
| C9 | 1.00 | 0.10959(8) | 0.4620(3) | 0.09671(17) | 0.0627(8) |
| H9A | 1.00 | 0.1221 | 0.4099 | 0.0796 | 0.063(9) |
| H9B | 1.00 | 0.0997 | 0.4254 | 0.1289 | 0.064(8) |
| C10 | 1.00 | 0.08241(9) | 0.5024(3) | 0.03070(18) | 0.0723(9) |
| H10A | 1.00 | 0.0703 | 0.5576 | 0.0462 | 0.094(10) |
| H10B | 1.00 | 0.0918 | 0.5331 | -0.0045 | 0.081(13) |
| C11 | 1.00 | 0.05948(10) | 0.4131(3) | -0.0052(2) | 0.0913(12) |
| H11A | 1.00 | 0.0522 | 0.3778 | 0.0318 | 0.09(2) |
| H11B | 1.00 | 0.0714 | 0.3614 | -0.0243 | 0.132(13) |
| C12 | 1.00 | 0.02982(12) | 0.4483(4) | -0.0670(3) | 0.1070(14) |
| H12A | 1.00 | 0.0165 | 0.3870 | -0.0870 | 0.15(2) |
| H12B | 1.00 | 0.0368 | 0.4820 | -0.1050 | 0.30(5) |
| H12C | 1.00 | 0.0173 | 0.4984 | -0.0483 | 0.18(3) |
| C13 | 1.00 | 0.15513(8) | 0.4865(3) | 0.20851(17) | 0.0653(8) |
| H13A | 1.00 | 0.1416 | 0.4618 | 0.2372 | 0.072(9) |
| H13B | 1.00 | 0.1636 | 0.4241 | 0.1910 | 0.073(10) |
| C14 | 1.00 | 0.18358(10) | 0.5460(3) | 0.25914(19) | 0.0809(10) |
| H14A | 1.00 | 0.1760 | 0.6098 | 0.2770 | 0.084(11) |
| H14B | 1.00 | 0.1986 | 0.5666 | 0.2330 | 0.135(17) |
| C15 | 1.00 | 0.20100(13) | 0.4733(6) | 0.3240(3) | 0.1226(18) |
| H15A | 1.00 | 0.1869 | 0.4651 | 0.3544 | 0.16(2) |
| H15B | 1.00 | 0.2035 | 0.4037 | 0.3047 | 0.27(5) |
| C16 | 1.00 | 0.23250(13) | 0.5074(5) | 0.3700(3) | 0.1220(18) |
| H16A | 1.00 | 0.2406 | 0.4573 | 0.4098 | 0.22(3) |
| H16B | 1.00 | 0.2306 | 0.5771 | 0.3899 | 0.9(2) |
| H16C | 1.00 | 0.2475 | 0.5109 | 0.3414 | 0.27(4) |
| N17 | 1.00 | 0.13316(6) | 0.54539(19) | 0.14183(12) | 0.0556(6) |
| C21 | 1.00 | 0.12936(7) | -0.0455(2) | 0.07939(14) | 0.0504(7) |
| H21A | 1.00 | 0.1435 | -0.0824 | 0.1215 | 0.040(6) |
| H21B | 1.00 | 0.1129 | -0.0956 | 0.0528 | 0.052(7) |
| C22 | 1.00 | 0.14958(8) | -0.0121(3) | 0.02981(16) | 0.0614(8) |
| H22A | 1.00 | 0.1354 | 0.0176 | -0.0152 | 0.088(10) |
| H22B | 1.00 | 0.1650 | 0.0424 | 0.0540 | 0.081(12) |
| C23 | 1.00 | 0.16779(9) | -0.1068(3) | 0.01233(19) | 0.0720(9) |
| H23A | 1.00 | 0.1524 | -0.1629 | -0.0087 | 0.100(13) |
| H23B | 1.00 | 0.1829 | -0.1337 | 0.0573 | 0.092(12) |
| C24 | 1.00 | 0.18666(11) | -0.0788(4) | -0.0409(2) | 0.0975(13) |
| H24A | 1.00 | 0.1978 | -0.1414 | -0.0502 | 0.114(14) |
| H24B | 1.00 | 0.2024 | -0.0237 | -0.0197 | 0.17(3) |
| H24C | 1.00 | 0.1717 | -0.0535 | -0.0865 | 0.116(15) |
| C25 | 1.00 | 0.09402(7) | -0.0047(2) | 0.15549(14) | 0.0510(7) |
| H25A | 1.00 | 0.1098 | -0.0371 | 0.1973 | 0.054(8) |
| H25B | 1.00 | 0.0803 | -0.0609 | 0.1281 | 0.048(7) |
| C26 | 1.00 | 0.07279(7) | 0.0720(3) | 0.18350(15) | 0.0589(8) |
| H26A | 1.00 | 0.0527 | 0.0858 | 0.1448 | 0.061(8) |
| H26B | 1.00 | 0.0841 | 0.1389 | 0.1971 | 0.053(8) |
| C27 | 1.00 | 0.06487(8) | 0.0247(3) | 0.25030(16) | 0.0685(9) |
| H27A | 1.00 | 0.0476 | 0.0659 | 0.2594 | 0.083(10) |
| H27B | 1.00 | 0.0570 | -0.0473 | 0.2389 | 0.079(11) |
| C28 | 1.00 | 0.09385(10) | 0.0232(4) | 0.31920(17) | 0.0840(12) |
| H28A | 1.00 | 0.0875 | -0.0085 | 0.3588 | 0.120(15) |
| H28B | 1.00 | 0.1013 | 0.0953 | 0.3322 | 0.123(17) |
| H28C | 1.00 | 0.1113 | -0.0182 | 0.3106 | 0.115(15) |
| C29 | 1.00 | 0.08908(6) | 0.1073(2) | 0.04315(13) | 0.0490(7) |
| H29A | 1.00 | 0.0797 | 0.1650 | 0.0635 | 0.051(8) |
| H29B | 1.00 | 0.1018 | 0.1390 | 0.0149 | 0.055(7) |
| C30 | 1.00 | 0.06136(6) | 0.0447(2) | -0.00904(13) | 0.0514(7) |
| H30A | 1.00 | 0.0467 | 0.0193 | 0.0167 | 0.061(8) |
| H30B | 1.00 | 0.0700 | -0.0163 | -0.0278 | 0.055(8) |
| C31 | 1.00 | 0.04288(7) | 0.1171(3) | -0.07264(15) | 0.0620(8) |
| H31A | 1.00 | 0.0359 | 0.1806 | -0.0530 | 0.081(10) |
| H31B | 1.00 | 0.0575 | 0.1389 | -0.0994 | 0.075(10) |
| C32 | 1.00 | 0.01322(8) | 0.0633(3) | -0.12526(18) | 0.0784(10) |
| H32A | 1.00 | 0.0024 | 0.1125 | -0.1639 | 0.123(15) |
| H32B | 1.00 | -0.0017 | 0.0422 | -0.0990 | 0.102(13) |
| H32C | 1.00 | 0.0201 | 0.0011 | -0.1463 | 0.103(14) |
| C33 | 1.00 | 0.13734(6) | 0.1267(2) | 0.15034(14) | 0.0522(7) |
| H33A | 1.00 | 0.1472 | 0.1606 | 0.1171 | 0.053(8) |
| H33B | 1.00 | 0.1259 | 0.1812 | 0.1684 | 0.058(7) |
| C34 | 1.00 | 0.16449(8) | 0.0821(3) | 0.21526(17) | 0.0718(9) |
| H34A | 1.00 | 0.1763 | 0.0278 | 0.1982 | 0.109(15) |
| H34B | 1.00 | 0.1551 | 0.0497 | 0.2498 | 0.105(13) |
| C35 | 1.00 | 0.18807(8) | 0.1707(3) | 0.25359(18) | 0.0761(10) |
| H35A | 1.00 | 0.1756 | 0.2296 | 0.2635 | 0.077(10) |
| H35B | 1.00 | 0.2019 | 0.1442 | 0.3001 | 0.091(11) |
| C36 | 1.00 | 0.20904(12) | 0.2103(5) | 0.2102(3) | 0.1108(15) |
| H36A | 1.00 | 0.2227 | 0.2675 | 0.2365 | 0.17(2) |
| H36B | 1.00 | 0.1954 | 0.2363 | 0.1633 | 0.18(3) |
| H36C | 1.00 | 0.2226 | 0.1528 | 0.2025 | 0.24(4) |
| N37 | 1.00 | 0.11236(5) | 0.04542(18) | 0.10694(11) | 0.0464(5) |
| C41 | 1.00 | 0.23474(6) | 0.7628(2) | 0.46971(12) | 0.0465(6) |
| C42 | 1.00 | 0.23550(6) | 0.8032(2) | 0.40172(13) | 0.0502(7) |
| H42 | 1.00 | 0.2563 | 0.8195 | 0.3950 | 0.052(7) |
| C43 | 1.00 | 0.20742(7) | 0.8202(2) | 0.34449(13) | 0.0494(7) |
| C44 | 1.00 | 0.17431(7) | 0.8057(2) | 0.34700(13) | 0.0517(7) |
| C45 | 1.00 | 0.17522(6) | 0.7656(2) | 0.41930(14) | 0.0525(7) |
| C46 | 1.00 | 0.20383(6) | 0.7462(2) | 0.47641(13) | 0.0507(7) |
| H46 | 1.00 | 0.2021 | 0.7202 | 0.5226 | 0.055(8) |
| N47 | 1.00 | 0.21214(7) | 0.8560(2) | 0.27540(12) | 0.0615(7) |
| N48 | 1.00 | 0.14497(6) | 0.7455(3) | 0.43573(14) | 0.0724(8) |
| O49 | 1.00 | 0.23424(6) | 0.9193(2) | 0.27804(12) | 0.0884(8) |
| O50 | 1.00 | 0.19386(6) | 0.8212(2) | 0.21704(10) | 0.0805(7) |
| O51 | 1.00 | 0.11944(7) | 0.7493(5) | 0.38866(16) | 0.189(2) |
| O52 | 1.00 | 0.14546(5) | 0.7279(2) | 0.49932(12) | 0.0746(6) |
| O53 | 1.00 | 0.14932(5) | 0.82751(19) | 0.29519(11) | 0.0705(6) |
| C61 | 1.00 | 0.01427(6) | -0.2900(2) | -0.21596(13) | 0.0490(7) |
| C62 | 1.00 | 0.01115(7) | -0.2599(2) | -0.14877(13) | 0.0511(7) |
| H62 | 1.00 | -0.0103 | -0.2437 | -0.1458 | 0.050(7) |
| C63 | 1.00 | 0.03777(7) | -0.2520(2) | -0.08538(13) | 0.0542(7) |
| C64 | 1.00 | 0.07129(7) | -0.2705(2) | -0.08344(14) | 0.0548(7) |
| C65 | 1.00 | 0.07240(7) | -0.3089(3) | -0.15506(15) | 0.0565(7) |
| C66 | 1.00 | 0.04579(7) | -0.3154(2) | -0.21731(14) | 0.0544(7) |
| H66 | 1.00 | 0.0489 | -0.3380 | -0.2629 | 0.064(8) |
| N67 | 1.00 | 0.03044(7) | -0.2198(2) | -0.01960(13) | 0.0712(8) |
| N68 | 1.00 | 0.10398(6) | -0.3392(3) | -0.16260(16) | 0.0749(8) |
| O69 | 1.00 | 0.00253(8) | -0.1877(4) | -0.02523(14) | 0.1428(16) |
| O70 | 1.00 | 0.05166(7) | -0.2176(2) | 0.03948(11) | 0.0962(9) |
| O71 | 1.00 | 0.12380(7) | -0.3842(3) | -0.11193(16) | 0.1347(14) |
| O72 | 1.00 | 0.10918(6) | -0.3208(2) | -0.22166(15) | 0.0936(8) |
| O73 | 1.00 | 0.09618(5) | -0.2544(2) | -0.02984(11) | 0.0758(7) |

Table 3 Bond lengths of (TBA)2(TNBP)

(excluded Hydrogen atoms)

| Bond | Length(Ǻ) |
| --- | --- |
| C1 -C2 | 1.511(4) |
| C1 -N17 | 1.531(4) |
| C2 -C3 | 1.526(5) |
| C3 -C4 | 1.497(5) |
| C5 -C6 | 1.513(5) |
| C5 -N17 | 1.517(3) |
| C6 -C7 | 1.534(5) |
| C7 -C8 | 1.480(6) |
| C9 -C10 | 1.512(4) |
| C9 -N17 | 1.517(4) |
| C10-C11 | 1.502(5) |
| C11-C12 | 1.506(6) |
| C13-C14 | 1.496(5) |
| C13-N17 | 1.516(4) |
| C14-C15 | 1.528(6) |
| C15-C16 | 1.428(6) |
| C21-C22 | 1.520(4) |
| C21-N37 | 1.524(4) |
| C22-C23 | 1.507(4) |
| C23-C24 | 1.517(5) |
| C25-C26 | 1.522(4) |
| C25-N37 | 1.517(3) |
| bond | length(Ǻ) |
| C26-C27 | 1.5304) |
| C27-C28 | 1.503(5) |
| C29-C30 | 1.510(4) |
| C29-N37 | 1.522(3) |
| C30-C31 | 1.522(4) |
| C31-C32 | 1.511(4) |
| C33-C34 | 1.517(4) |
| C33-N37 | 1.519(3) |
| C34-C35 | 1.521(5) |
| C35-C36 | 1.478(5) |
| C41-C42 | 1.398(3) |
| C41-C46 | 1.382(4) |
| C41-C41' | 1.487(5) |
| C42-C43 | 1.368(3) |
| C43-C44 | 1.443(4) |
| C43-N47 | 1.459(3) |
| C44-C45 | 1.452(4) |
| C44-O53 | 1.242(3) |
| C45-C46 | 1.386(4) |
| C45-N48 | 1.443(4) |
| N47-O49 | 1.221(3) |
| N47-O50 | 1.224(3) |
| bond | length(Ǻ) |
| N48-O51 | 1.182(3) |
| N48-O52 | 1.223(3) |
| C61-C62 | 1.377(3) |
| C61-C66 | 1.393(3) |
| C61-C61' | 1.482(5) |
| C62-C63 | 1.385(4) |
| C63-C64 | 1.441(3) |
| C63-N67 | 1.438(3) |
| C64-C65 | 1.458(4) |
| C64-O73 | 1.244(3) |
| C65-C66 | 1.370(4) |
| C65-N68 | 1.451(4) |
| N67-O69 | 1.232(4) |
| N67-O70 | 1.209(3) |
| N68-O71 | 1.209(4) |
| N68-O72 | 1.232(4) |

Table 4 Bond angles of (TBA)2(TNBP)

(excluded Hydrogen atoms)

| bond | angle(°) |
| --- | --- |
| C2 -C1 -N17 | 115.4(3) |
| C1 -C2 -C3 | 110.4(3) |
| C2 -C3 -C4 | 112.1(3) |
| C6 -C5 -N17 | 115.7(3) |
| C5 -C6 -C7 | 111.3(3) |
| C6 -C7 -C8 | 114.5(4) |
| C10-C9 -N17 | 116.7(3) |
| C9 -C10-C11 | 111.1(3) |
| C10-C11-C12 | 114.5(4) |
| C14-C13-N17 | 118.2(3) |
| C13-C14-C15 | 109.0(4) |
| C14-C15-C16 | 117.0(5) |
| C1 -N17-C5 | 106.3(2) |
| C1 -N17-C9 | 111.0(2) |
| C1 -N17-C13 | 110.6(2) |
| C5 -N17-C9 | 111.0(2) |
| C5 -N17-C13 | 112.0(2) |
| C9 -N17-C13 | 106.0(2) |
| C22-C21-N37 | 115.6(2) |
| C21-C22-C23 | 110.7(3) |
| C22-C23-C24 | 112.6(3) |
| C26-C25-N37 | 115.5(2) |
| C25-C26-C27 | 110.9(3) |
| C26-C27-C28 | 113.3(3) |
| C30-C29-N37 | 116.9(2) |
| C29-C30-C31 | 109.1(2) |
| C30-C31-C32 | 112.9(3) |
| C34-C33-N37 | 115.7(2) |
| C33-C34-C35 | 110.8(3) |
| C34-C35-C36 | 113.6(3) |
| C21-N37-C25 | 107.1(2) |
| C21-N37-C29 | 111.5(2) |
| C21-N37-C33 | 110.6(2) |
| C25-N37-C29 | 111.1(2) |
| C25-N37-C33 | 110.6(2) |
| C29-N37-C33 | 105.9(2) |
| C42-C41-C46 | 115.7(2) |
| C42-C41-C41' | 122.0(3) |
| C46-C41-C41' | 122.3(3) |
| C41-C42-C43 | 121.9(2) |
| C42-C43-C44 | 125.8(2) |
| bond | angle(°) |
| C42-C43-N47 | 115.7(2) |
| C44-C43-N47 | 118.5(2) |
| C43-C44-C45 | 109.5(2) |
| C43-C44-O53 | 124.1(2) |
| C45-C44-O53 | 126.4(3) |
| C44-C45-C46 | 124.3(2) |
| C44-C45-N48 | 120.0(2) |
| C46-C45-N48 | 115.8(2) |
| C41-C46-C45 | 122.8(2) |
| C43-N47-O49 | 118.7(2) |
| C43-N47-O50 | 118.9(3) |
| O49-N47-O50 | 122.5(3) |
| C45-N48-O51 | 120.7(3) |
| C45-N48-O52 | 120.1(2) |
| O51-N48-O52 | 119.2(3) |
| C62-C61-C66 | 116.7(2) |
| C62-C61-C61' | 121.5(3) |
| C66-C61-C61' | 121.8(3) |
| C61-C62-C63 | 122.7(3) |
| C62-C63-C64 | 123.8(2) |
| C62-C63-N67 | 115.9(3) |
| C64-C63-N67 | 120.2(2) |
| C63-C64-C65 | 110.2(2) |
| C63-C64-O73 | 126.1(3) |
| C65-C64-O73 | 123.6(3) |
| C64-C65-C66 | 124.8(3) |
| C64-C65-N68 | 118.4(2) |
| C66-C65-N68 | 116.8(2) |
| C61-C66-C65 | 121.5(2) |
| C63-N67-O69 | 118.6(3) |
| C63-N67-O70 | 120.9(3) |
| O69-N67-O70 | 120.3(3) |
| C65-N68-O71 | 119.2(3) |
| C65-N68-O72 | 118.4(3) |
| O71-N68-O72 | 122.3(3) |
