# Supplementary material for: Preparation of metallic BEDT-TTF charge transfer complex of 3,3′,5,5′-tetranitro-4,4′-biphenyldiol dianion (TNBP2−) having flexible molecular shape
Source: Royal Society of Chemistry journal article supplement (doi:10.1039/a907746d), 2000-01-01
Supplement: a907746dt2.doc [file a907746dt2.doc]

Table 5 Crystal data and structure refinement data for (Ph4P)2(TNBP)

|  | (Ph4P)2(TNBP) |
| --- | --- |
| formula | C60H44O10N4P2 |
| formula weight | 1042.98 |
| shape and color | red plate |
| crystal dimension /mm3 | 0.200.150.05 |
| crystal system | Triclinic |
| space group | *P*1 |
| ***a***/Å | 9.396(2) |
| ***b*** /Å | 10.436(2) |
| ***c*** /Å | 14.038(3) |
| ****** /° | 113.226(9) |
| ****** /° | 96.24(1) |
| ****** /° | 94.51(1) |
| ***V*** /Å3 | 1246.3(5) |
| ***Z*** | 1 |
| density(calc.)(g/cm3) | 1.390 |
| diffractometer | Mac Science DIP-2020K |
| radiation type | Mo K |
| monochromator | graphite |
| X-ray voltage and current | 50 kV, 36 mA |
| temperature | room temperature |
| **Mo K/mm-1 | 0.149 |
| 2**max /° | 55 |
| no. of independent  observed reflections | 4627 |
| determination of initial phase | direct method (Shelxs86) |
| hydrogen atoms | Positions were calculated, assuming C-H  bond length as 0.96Å and sp2  conformation of the carbon atoms.  Temperature factors are refined. |
| least square method | full matrix, refinement on *F*O (Crystan 6.3) |
| criterion for obsd reflections | *F*03***F*0) |
| no. of reflections used refinement | 2697 |
| no. of refined parameters | 365 |
| temperature factor | Non-hydrogen atoms were anisotropic, and hydrogen atoms were isotropic. |
| ***R*** | 0.0676 |
|  |  |

Table 6

Atomic coordinates and thermal parameters of (Ph4P)2(TNBP)

| Atom | SOF | x | y | z | Ueq |
| --- | --- | --- | --- | --- | --- |
| P1 | 1.00 | 0.9040(2) | 0.4802(2) | 0.1935(1) | 0.0385(7) |
| C2 | 1.00 | 0.8795(6) | 0.3057(6) | 0.0915(4) | 0.041(3) |
| C3 | 1.00 | 0.9783(7) | 0.2605(6) | 0.0234(5) | 0.048(3) |
| C4 | 1.00 | 0.9524(7) | 0.1274(7) | -0.0562(5) | 0.061(4) |
| C5 | 1.00 | 0.8275(8) | 0.0390(7) | -0.0684(5) | 0.058(4) |
| C6 | 1.00 | 0.7290(8) | 0.0847(7) | -0.0006(5) | 0.062(4) |
| C7 | 1.00 | 0.7550(7) | 0.2169(7) | 0.0804(5) | 0.056(4) |
| C8 | 1.00 | 1.0916(6) | 0.5534(6) | 0.2193(4) | 0.042(3) |
| C9 | 1.00 | 1.1968(6) | 0.4809(6) | 0.2463(5) | 0.049(3) |
| C10 | 1.00 | 1.3413(7) | 0.5369(7) | 0.2661(5) | 0.057(4) |
| C11 | 1.00 | 1.3805(7) | 0.6636(7) | 0.2604(5) | 0.059(4) |
| C12 | 1.00 | 1.2768(7) | 0.7350(6) | 0.2342(5) | 0.058(4) |
| C13 | 1.00 | 1.1334(6) | 0.6805(6) | 0.2142(5) | 0.051(3) |
| C14 | 1.00 | 0.7993(6) | 0.5896(6) | 0.1506(4) | 0.040(3) |
| C15 | 1.00 | 0.7996(7) | 0.7317(6) | 0.2181(5) | 0.052(3) |
| C16 | 1.00 | 0.7221(7) | 0.8170(7) | 0.1839(6) | 0.060(4) |
| C17 | 1.00 | 0.6456(7) | 0.7624(8) | 0.0846(6) | 0.070(4) |
| C18 | 1.00 | 0.6444(7) | 0.6243(8) | 0.0166(5) | 0.064(4) |
| C19 | 1.00 | 0.7218(6) | 0.5386(6) | 0.0507(4) | 0.048(3) |
| C20 | 1.00 | 0.8412(6) | 0.4674(6) | 0.3061(4) | 0.045(3) |
| C21 | 1.00 | 0.8954(7) | 0.3754(8) | 0.3448(5) | 0.070(5) |
| C22 | 1.00 | 0.8433(9) | 0.3593(9) | 0.4280(6) | 0.086(5) |
| C23 | 1.00 | 0.7374(8) | 0.4343(8) | 0.4734(5) | 0.070(4) |
| C24 | 1.00 | 0.6834(7) | 0.5261(7) | 0.4360(5) | 0.062(4) |
| C25 | 1.00 | 0.7348(7) | 0.5432(7) | 0.3527(5) | 0.056(4) |
| H3 | 1.00 | 1.065(6) | 0.321(6) | 0.031(4) | 0.06(2) |
| H4 | 1.00 | 1.021(6) | 0.096(5) | -0.103(4) | 0.09(2) |
| H5 | 1.00 | 0.810(6) | -0.054(6) | -0.124(4) | 0.06(2) |
| H6 | 1.00 | 0.641(6) | 0.024(6) | -0.010(4) | 0.05(2) |
| H7 | 1.00 | 0.687(6) | 0.247(6) | 0.129(4) | 0.08(2) |
| H9 | 1.00 | 1.170(6) | 0.393(5) | 0.251(4) | 0.05(2) |
| H10 | 1.00 | 1.414(6) | 0.487(6) | 0.283(4) | 0.06(2) |
| H11 | 1.00 | 1.480(6) | 0.703(6) | 0.276(4) | 0.07(2) |
| H12 | 1.00 | 1.305(6) | 0.822(6) | 0.229(4) | 0.09(2) |
| H13 | 1.00 | 1.061(6) | 0.731(6) | 0.197(4) | 0.04(2) |
| H15 | 1.00 | 0.854(6) | 0.769(6) | 0.287(4) | 0.06(2) |
| H16 | 1.00 | 0.722(6) | 0.914(6) | 0.230(4) | 0.07(2) |
| H17 | 1.00 | 0.592(6) | 0.822(6) | 0.062(4) | 0.07(2) |
| H18 | 1.00 | 0.590(6) | 0.588(6) | -0.053(4) | 0.08(2) |
| H19 | 1.00 | 0.7220(4) | 0.4423(4) | 0.0037(3) | 0.03(1) |
| H21 | 1.00 | 0.9700(4) | 0.3225(5) | 0.3138(3) | 0.06(2) |
| H22 | 1.00 | 0.8809(4) | 0.2944(5) | 0.4540(3) | 0.11(3) |
| H23 | 1.00 | 0.7024(5) | 0.4229(5) | 0.5317(4) | 0.09(2) |
| H24 | 1.00 | 0.6091(6) | 0.5785(6) | 0.4678(4) | 0.07(2) |
| H25 | 1.00 | 0.6964(5) | 0.6079(5) | 0.3269(4) | 0.06(2) |
| C26 | 1.00 | 0.4540(6) | 0.0302(6) | 0.4700(4) | 0.041(3) |
| C27 | 1.00 | 0.3076(6) | 0.0431(6) | 0.4809(4) | 0.043(3) |
| C28 | 1.00 | 0.2236(6) | 0.0951(6) | 0.4228(4) | 0.040(3) |
| C29 | 1.00 | 0.2709(6) | 0.1487(6) | 0.3485(4) | 0.042(3) |
| C30 | 1.00 | 0.4183(6) | 0.1277(6) | 0.3375(4) | 0.042(3) |
| C31 | 1.00 | 0.5029(6) | 0.0714(6) | 0.3952(4) | 0.045(3) |
| O32 | 1.00 | 0.1907(5) | 0.2047(4) | 0.3035(3) | 0.058(3) |
| O33 | 1.00 | -0.0197(5) | 0.0458(5) | 0.3567(4) | 0.070(3) |
| O34 | 1.00 | 0.0422(5) | 0.1534(5) | 0.5253(3) | 0.065(3) |
| O35 | 1.00 | 0.4344(5) | 0.2389(5) | 0.2249(4) | 0.083(3) |
| O36 | 1.00 | 0.5866(6) | 0.0993(6) | 0.2262(4) | 0.111(4) |
| N37 | 1.00 | 0.0722(5) | 0.0988(5) | 0.4356(4) | 0.050(3) |
| N38 | 1.00 | 0.4844(6) | 0.1586(5) | 0.2596(4) | 0.053(3) |
| H27 | 1.00 | 0.2662(5) | 0.0140(5) | 0.5299(4) | 0.05(2) |
| H31 | 1.00 | 0.6006(2) | 0.0608(2) | 0.3826(1) | 0.03(1) |

Table 7 Bond lengths of (Ph4P)2(TNBP)

(excluded Hydrogen atoms)

| bond | length(Å) |
| --- | --- |
| C2 -C3 | 1.380(9) |
| C2 -C7 | 1.388(9) |
| C2 -P1 | 1.796(6) |
| C3 -C4 | 1.379(9) |
| C4 -C5 | 1.39(1) |
| C5 -C6 | 1.38(1) |
| C6 -C7 | 1.38(1) |
| C8 -C9 | 1.398(8) |
| C8 -C13 | 1.385(8) |
| C8 -P1 | 1.804(6) |
| C9 -C10 | 1.388(9) |
| C10-C11 | 1.38(1) |
| C11-C12 | 1.38(1) |
| C12-C13 | 1.374(9) |
| C14-C15 | 1.410(9) |
| C14-C19 | 1.382(8) |
| C14-P1 | 1.796(6) |
| C15-C16 | 1.38(1) |
| bond | length(Å) |
| C16-C17 | 1.37(1) |
| C17-C18 | 1.38(1) |
| C18-C19 | 1.39(1) |
| C20-C21 | 1.38(1) |
| C20-C25 | 1.383(9) |
| C20-P1 | 1.795(6) |
| C21-C22 | 1.37(1) |
| C22-C23 | 1.37(1) |
| C23-C24 | 1.37(1) |
| C24-C25 | 1.38(1) |
| C26-C26’ | 1.483(8) |
| C26-C27 | 1.412(8) |
| C26-C31 | 1.389(8) |
| C27-C28 | 1.364(8) |
| C28-C29 | 1.456(8) |
| C28-N37 | 1.455(7) |
| C29-C30 | 1.434(9) |
| C29-O32 | 1.251(7) |
| bond | length(Å) |
| C30-C31 | 1.394(8) |
| C30-N38 | 1.443(7) |
| O33-N37 | 1.230(7) |
| O34-N37 | 1.235(7) |
| O35-N38 | 1.222(7) |
| O36-N38 | 1.220(7) |

Table 8 Bond angles of (Ph4P)2(TNBP)

(excluded Hydrogen atoms)

| bond | angle(°) |
| --- | --- |
| C2 -P1 -C8 | 109.4(3) |
| C2 -P1 -C14 | 109.3(3) |
| C2 -P1 -C20 | 107.4(3) |
| C8 -P1 -C14 | 108.1(3) |
| C8 -P1 -C20 | 112.8(3) |
| C14-P1 -C20 | 110.0(3) |
| C3 -C2 -C7 | 120.1(6) |
| C3 -C2 -P1 | 121.8(5) |
| C7 -C2 -P1 | 118.1(5) |
| C2 -C3 -C4 | 119.8(6) |
| C3 -C4 -C5 | 120.4(7) |
| C4 -C5 -C6 | 119.6(6) |
| C5 -C6 -C7 | 120.5(7) |
| C2 -C7 -C6 | 119.6(6) |
| C9 -C8 -C13 | 119.4(6) |
| C9 -C8 -P1 | 119.2(5) |
| C13-C8 -P1 | 121.4(5) |
| C8 -C9 -C10 | 119.3(6) |
| C9 -C10-C11 | 120.3(6) |
| C10-C11-C12 | 120.3(6) |
| C11-C12-C13 | 120.0(6) |
| C8 -C13-C12 | 120.7(6) |
| C15-C14-C19 | 118.9(6) |
| C15-C14-P1 | 119.9(5) |
| C19-C14-P1 | 121.2(5) |
| C14-C15-C16 | 119.8(6) |
| C15-C16-C17 | 119.6(7) |
| C16-C17-C18 | 121.8(7) |
| C17-C18-C19 | 118.7(7) |
| C14-C19-C18 | 121.2(6) |
| C21-C20-C25 | 118.8(6) |
| C21-C20-P1 | 119.6(5) |
| C25-C20-P1 | 121.6(5) |
| C20-C21-C22 | 120.3(7) |
| C21-C22-C23 | 120.5(8) |
| C22-C23-C24 | 119.7(7) |
| C23-C24-C25 | 120.3(7) |
| C20-C25-C24 | 120.4(6) |
| C26’-C26-C27 | 122.3(5) |
| bond | angle(°) |
| C26’-C26-C31 | 122.7(5) |
| C27-C26-C31 | 115.0(5) |
| C26-C27-C28 | 121.4(5) |
| C27-C28-C29 | 126.2(6) |
| C27-C28-N37 | 117.7(5) |
| C29-C28-N37 | 116.1(5) |
| C28-C29-C30 | 109.8(5) |
| C28-C29-O32 | 122.9(6) |
| C30-C29-O32 | 127.3(6) |
| C29-C30-C31 | 123.7(5) |
| C29-C30-N38 | 120.0(5) |
| C31-C30-N38 | 116.3(5) |
| C26-C31-C30 | 123.7(6) |
| C28-N37-O33 | 118.4(5) |
| C28-N37-O34 | 118.4(5) |
| O33-N37-O34 | 123.2(5) |
| C30-N38-O35 | 120.0(5) |
| C30-N38-O36 | 119.0(6) |
| O35-N38-O36 | 120.8(6) |
