# Supplementary material for: Preparation of metallic BEDT-TTF charge transfer complex of 3,3′,5,5′-tetranitro-4,4′-biphenyldiol dianion (TNBP2−) having flexible molecular shape
Source: Royal Society of Chemistry journal article supplement (doi:10.1039/a907746d), 2000-01-01
Supplement: a907746dt3.doc [file a907746dt3.doc]

Table 9 Crystal data and structure refinement data for (ET)4(TNBP)

|  | (ET)4(TNBP) |
| --- | --- |
| formula | C52H36N4O10S32 |
| formula weight | 1902.99 |
| shape and color | black plate |
| crystal dimension /mm３ | 0.650.350.03 |
| crystal system | Triclinic |
| space group | P1 |
| ***a***/Å | 8.691(1) |
| ***b*** /Å | 12.936(1) |
| ***c*** /Å | 16.208(2) |
| ****** /° | 97.376(2) |
| ****** /° | 96.234(9) |
| ****** /° | 103.888(9) |
| ***V*** /Å 3 | 1735.9(3) |
| ***Z*** | 1 |
| density(calc.)(g/cm3) | 1.820 |
| density(obs.)(g/cm3) | 1.81 |
| diffractometer | Mac Science MXC |
| radiation type | Mo K |
| monochromator | graphite |
| X-ray voltage and current | 50 kV, 36 mA |
| temperature | room temperature |
| **Mo K/mm-1 | 1.00 |
| 2**max /° | 55 |
| no. of independent  observed reflections | 8577 |
| determination of initial phase | direct method (Shelxs86) |
| hydrogen atoms | Positions were calculated, assuming C-H  bond length as 0.96Å and sp2 or sp3  conformation of the carbon atoms.  Temperature factors are refined. |
| least square method | full matrix, refinement of *F*O (Crystan 6.3) |
| criterion for obsd reflections | *F*04***F*0) |
| no. of reflections used refinement | 4906 |
| no. of refined parameters | 442 |
| temperature factor | Non-hydrogen atoms are anisotropic, and hydrogen atoms are isotropic. |
| ***R*** | 0.0656 |
|  |  |

Table 10

Atomic coordinates and thermal parameters of (ET)4(TNBP)

| Atom | SOF | x | y | z | Ueq |
| --- | --- | --- | --- | --- | --- |
| S1 | 1.00 | 0.5643(3) | 0.5883(2) | 0.7217(2) | 0.061(1) |
| S2 | 1.00 | 0.5917(3) | 0.3218(2) | 0.7104(1) | 0.049(1) |
| S3 | 1.00 | 0.3379(2) | 0.5065(1) | 0.5659(1) | 0.0369(9) |
| S4 | 1.00 | 0.3655(2) | 0.2834(1) | 0.5547(1) | 0.0355(9) |
| S5 | 1.00 | 0.0731(2) | 0.4353(1) | 0.3988(1) | 0.0380(9) |
| S6 | 1.00 | 0.0983(2) | 0.2122(1) | 0.3906(1) | 0.0366(9) |
| S7 | 1.00 | -0.1615(3) | 0.3936(2) | 0.2466(1) | 0.055(1) |
| S8 | 1.00 | -0.1418(2) | 0.1276(1) | 0.2365(1) | 0.0373(9) |
| C9 | 1.00 | 0.6918(12) | 0.5338(8) | 0.7878(6) | 0.061(5) |
| C10 | 1.00 | 0.6259(12) | 0.4210(8) | 0.8016(5) | 0.061(5) |
| C11 | 1.00 | 0.4673(9) | 0.4779(6) | 0.6450(4) | 0.034(3) |
| C12 | 1.00 | 0.4791(8) | 0.3757(5) | 0.6401(4) | 0.031(3) |
| C13 | 1.00 | 0.2741(8) | 0.3749(5) | 0.5126(4) | 0.029(3) |
| C14 | 1.00 | 0.1617(8) | 0.3442(5) | 0.4431(4) | 0.031(3) |
| C15 | 1.00 | -0.0485(8) | 0.3401(5) | 0.3158(4) | 0.031(3) |
| C16 | 1.00 | -0.0381(8) | 0.2368(5) | 0.3131(4) | 0.030(3) |
| C17 | 1.00 | -0.2559(12) | 0.2838(7) | 0.1660(5) | 0.057(5) |
| C18 | 1.00 | -0.1675(12) | 0.1968(7) | 0.1491(5) | 0.052(5) |
| H9A | 1.00 | 0.787(10) | 0.535(7) | 0.763(5) | 0.05 |
| H9B | 1.00 | 0.720(10) | 0.580(6) | 0.841(5) | 0.05 |
| H10A | 1.00 | 0.525(10) | 0.418(7) | 0.822(5) | 0.05 |
| H10B | 1.00 | 0.698(10) | 0.404(7) | 0.844(5) | 0.05 |
| H17A | 1.00 | -0.357(10) | 0.250(7) | 0.182(5) | 0.05 |
| H17B | 1.00 | -0.275(10) | 0.312(7) | 0.115(5) | 0.05 |
| H18A | 1.00 | -0.064(10) | 0.231(7) | 0.137(5) | 0.05 |
| H18B | 1.00 | -0.225(11) | 0.145(8) | 0.101(6) | 0.05 |
| S19 | 1.00 | 0.6607(2) | 1.1186(1) | 0.8189(1) | 0.0355(8) |
| S20 | 1.00 | 0.7088(2) | 0.8540(1) | 0.8007(1) | 0.0379(9) |
| S21 | 1.00 | 0.4590(2) | 1.0398(1) | 0.6539(1) | 0.0360(9) |
| S22 | 1.00 | 0.4899(2) | 0.8187(1) | 0.6419(1) | 0.0362(9) |
| S23 | 1.00 | 0.2117(3) | 0.9735(1) | 0.4799(1) | 0.0384(9) |
| S24 | 1.00 | 0.2284(2) | 0.7493(1) | 0.4735(1) | 0.0384(9) |
| S25 | 1.00 | -0.0232(3) | 0.9348(2) | 0.3286(1) | 0.054(1) |
| S26 | 1.00 | -0.0169(3) | 0.6649(2) | 0.3243(2) | 0.055(1) |
| C27 | 1.00 | 0.7222(8) | 1.0482(5) | 0.9005(4) | 0.030(3) |
| C28 | 1.00 | 0.8239(8) | 0.9730(6) | 0.8716(4) | 0.032(3) |
| C29 | 1.00 | 0.5785(8) | 1.0108(5) | 0.7372(4) | 0.030(3) |
| C30 | 1.00 | 0.5949(8) | 0.9094(6) | 0.7310(4) | 0.030(3) |
| C31 | 1.00 | 0.4009(8) | 0.9099(5) | 0.5986(4) | 0.031(3) |
| C32 | 1.00 | 0.2939(8) | 0.8809(5) | 0.5259(4) | 0.030(3) |
| C33 | 1.00 | 0.0887(9) | 0.8797(6) | 0.3979(4) | 0.034(3) |
| C34 | 1.00 | 0.0942(8) | 0.7763(6) | 0.3956(4) | 0.035(3) |
| C35 | 1.00 | -0.1322(14) | 0.8219(8) | 0.2557(7) | 0.078(6) |
| C36 | 1.00 | -0.0812(16) | 0.7276(9) | 0.2425(7) | 0.087(7) |
| H27A | 1.00 | 0.783(10) | 1.100(7) | 0.947(5) | 0.05 |
| H27B | 1.00 | 0.628(10) | 1.006(7) | 0.918(5) | 0.05 |
| H28A | 1.00 | 0.874(10) | 0.951(6) | 0.920(5) | 0.05 |
| H28B | 1.00 | 0.906(10) | 1.012(6) | 0.844(5) | 0.05 |
| H35A | 1.00 | -0.229(10) | 0.796(7) | 0.278(5) | 0.05 |
| H35B | 1.00 | -0.158(10) | 0.845(7) | 0.203(5) | 0.05 |
| H36A | 1.00 | 0.013(10) | 0.753(6) | 0.217(5) | 0.05 |
| H36B | 1.00 | -0.158(10) | 0.674(7) | 0.202(5) | 0.05 |
| C37 | 1.00 | -0.4330(7) | 0.5500(5) | 0.0069(4) | 0.026(3) |
| C38 | 1.00 | -0.2739(8) | 0.5469(5) | 0.0170(5) | 0.039(3) |
| C39 | 1.00 | -0.1510(8) | 0.6385(5) | 0.0244(5) | 0.037(3) |
| C40 | 1.00 | -0.1712(8) | 0.7465(5) | 0.0227(4) | 0.029(3) |
| C41 | 1.00 | -0.3376(7) | 0.7440(5) | 0.0222(4) | 0.026(3) |
| C42 | 1.00 | -0.4612(7) | 0.6529(5) | 0.0112(4) | 0.024(3) |
| N43 | 1.00 | 0.0090(9) | 0.6269(6) | 0.0392(8) | 0.097(5) |
| N44 | 1.00 | -0.3802(7) | 0.8471(4) | 0.0319(4) | 0.030(3) |
| O45 | 1.00 | 0.0245(8) | 0.5499(7) | 0.0900(5) | 0.080(5) |
| O46 | 1.00 | 0.1248(6) | 0.6851(4) | 0.0314(4) | 0.055(3) |
| O47 | 1.00 | -0.0632(6) | 0.8288(4) | 0.0218(4) | 0.053(3) |
| O48 | 1.00 | -0.2909(7) | 0.9234(4) | 0.0792(4) | 0.050(3) |
| O49 | 1.00 | -0.5058(6) | 0.8517(4) | -0.0089(4) | 0.045(3) |
| H38 | 1.00 | -0.249(11) | 0.479(7) | 0.019(6) | 0.05 |
| H42 | 1.00 | -0.569(10) | 0.659(6) | 0.006(5) | 0.05 |

Table 11 Bond lengths of (ET)4(TNBP)

(excluded Hydrogen atoms)

| bond | length(Å) |
| --- | --- |
| C9 -C10 | 1.49(1) |
| C9 -S1 | 1.78(1) |
| C10-S2 | 1.78(1) |
| C11-C12 | 1.34(1) |
| C11-S1 | 1.742(8) |
| C11-S3 | 1.747(8) |
| C12-S2 | 1.741(7) |
| C12-S4 | 1.740(7) |
| C13-C14 | 1.36(1) |
| C13-S3 | 1.737(7) |
| C13-S4 | 1.743(7) |
| C14-S5 | 1.741(7) |
| C14-S6 | 1.736(7) |
| C15-C16 | 1.36(1) |
| C15-S5 | 1.756(7) |
| C15-S7 | 1.729(8) |
| C16-S6 | 1.745(7) |
| C16-S8 | 1.745(7) |
| C17-C18 | 1.52(1) |
| C17-S7 | 1.769(9) |
| C18-S8 | 1.792(9) |
| bond | length(Å) |
| C27-C28 | 1.53(1) |
| C27-S19 | 1.804(7) |
| C28-S20 | 1.802(8) |
| C29-C30 | 1.35(1) |
| C29-S19 | 1.747(7) |
| C29-S21 | 1.748(7) |
| C30-S20 | 1.754(7) |
| C30-S22 | 1.749(7) |
| C31-C32 | 1.37(1) |
| C31-S21 | 1.729(7) |
| C31-S22 | 1.737(8) |
| C32-S23 | 1.739(7) |
| C32-S24 | 1.733(7) |
| C33-C34 | 1.35(1) |
| C33-S23 | 1.742(8) |
| C33-S25 | 1.737(8) |
| C34-S24 | 1.751(8) |
| C34-S26 | 1.734(8) |
| C35-C36 | 1.39(2) |
| C35-S25 | 1.75(1) |
|  |  |
| bond | length(Å) |
| C36-S26 | 1.75(1) |
| C37-C38 | 1.385(9) |
| C37-C42 | 1.405(9) |
| C37-C37' | 1.492(9) |
| C38-C39 | 1.37(1) |
| C39-C40 | 1.45(1) |
| C39-N43 | 1.43(1) |
| C40-C41 | 1.438(9) |
| C40-O47 | 1.242(9) |
| C41-C42 | 1.368(9) |
| C41-N44 | 1.462(8) |
| N43-O45 | 1.39(1) |
| N43-O46 | 1.13(1) |
| N44-O48 | 1.214(8) |
| N44-O49 | 1.232(8) |

Table 12 Bond angles of (ET)4(TNBP)

(excluded Hydrogen atoms)

| bond | angle(°) |
| --- | --- |
| C9 -S1 -C11 | 102.8(5) |
| C10 -S2 -C12 | 100.8(4) |
| C11 -S3 -C13 | 95.1(4) |
| C12 -S4 -C13 | 95.3(4) |
| C14 -S5 -C15 | 95.5(4) |
| C14 -S6 -C16 | 95.9(4) |
| C15 -S7 -C17 | 104.4(4) |
| C16 -S8 -C18 | 99.8(4) |
| C10 -C9 -S1 | 116.5(7) |
| C9 -C10-S2 | 114.7(7) |
| C12 -C11-S1 | 128.3(6) |
| C12 -C11-S3 | 117.3(6) |
| S1 -C11-S3 | 114.4(4) |
| C11 -C12-S2 | 128.0(6) |
| C11 -C12-S4 | 117.0(6) |
| S2 -C12-S4 | 114.9(4) |
| C14 -C13-S3 | 123.2(6) |
| C14 -C13-S4 | 121.7(6) |
| S3 -C13-S4 | 115.1(4) |
| C13 -C14-S5 | 122.2(5) |
| C13 -C14-S6 | 122.7(5) |
| S5 -C14-S6 | 115.0(4) |
| C16 -C15-S5 | 116.6(5) |
| C16 -C15-S7 | 129.0(6) |
| S5 -C15-S7 | 114.3(4) |
| C15 -C16-S6 | 116.9(6) |
| C15 -C16-S8 | 125.9(6) |
| S6 -C16-S8 | 117.1(4) |
| C18 -C17-S7 | 116.8(7) |
| C17 -C18-S8 | 113.3(6) |
| C27 -S19-C29 | 100.6(4) |
| C28 -S20-C30 | 101.5(4) |
| C29 -S21-C31 | 95.8(4) |
| C30 -S22-C31 | 95.6(4) |
| C32 -S23-C33 | 95.7(4) |
| C32 -S24-C34 | 95.5(4) |
| C33 -S25-C35 | 103.0(5) |
| C34 -S26-C36 | 100.7(5) |
| C28 -C27-S19 | 112.8(5) |
| C27 -C28-S20 | 112.8(5) |
| C30 -C29-S19 | 128.3(6) |
| bond | angle(°) |
| C30 -C29-S21 | 116.7(6) |
| S19 -C29-S21 | 115.0(4) |
| C29 -C30-S20 | 128.8(6) |
| C29 -C30-S22 | 116.8(6) |
| S20 -C30-S22 | 114.4(4) |
| C32 -C31-S21 | 122.8(6) |
| C32 -C31-S22 | 122.3(6) |
| S21 -C31-S22 | 114.8(4) |
| C31 -C32-S23 | 122.4(6) |
| C31 -C32-S24 | 122.7(6) |
| S23 -C32-S24 | 115.0(4) |
| C34 -C33-S23 | 116.9(6) |
| C34 -C33-S25 | 128.8(6) |
| S23 -C33-S25 | 114.3(4) |
| C33 -C34-S24 | 116.9(6) |
| C33 -C34-S26 | 127.7(6) |
| S24 -C34-S26 | 115.3(4) |
| C36 -C35-S25 | 122.2(9) |
| C35 -C36-S26 | 123.3(9) |
| C37’-C37-C38 | 122.0(6) |
| C37’-C37-C42 | 121.8(6) |
| C38 -C37-C42 | 116.2(6) |
| C37 -C38-C39 | 121.9(6) |
| C38 -C39-C40 | 125.0(7) |
| C38 -C39-N43 | 117.2(7) |
| C40 -C39-N43 | 117.7(6) |
| C39 -C40-C41 | 109.3(6) |
| C39 -C40-O47 | 126.1(6) |
| C41 -C40-O47 | 124.7(6) |
| C40 -C41-C42 | 125.6(6) |
| C40 -C41-N44 | 117.7(6) |
| C42 -C41-N44 | 116.7(6) |
| C37 -C42-C41 | 121.3(6) |
| C39 -N43-O45 | 113.3(7) |
| C39 -N43-O46 | 128.4(8) |
| O45 -N43-O46 | 115.8(9) |
| C41 -N44-O48 | 118.8(6) |
| C41 -N44-O49 | 117.8(6) |
| O48 -N44-O49 | 123.4(6) |
